# Supplementary material
Source: MDPI journal article supplement (https://www.mdpi.com/1999-4907/13/2/174)
Supplement: s1 [file s1]

Table S1. The average air temperature, the height of the snow cover and the time of its descent at different altitude levels of profiles 1 and 2 on the Imandra mountain and profiles 1, 2, 4 in the valley of Lake Small Vudayvr and profiles 1,2,3 Kitchepakh in 2018-2019. All sites are located in the Khibiny massif.

| Profile and level | Exposition | Altitude a. s. l., m | Mean air temperature ± SD (° C) |                  |                |                | Snow depth (cm) |              |         |
|-------------------|------------|----------------------|---------------------------------|------------------|----------------|----------------|-----------------|--------------|---------|
|                   |            |                      | 15-31 July 2018                 | 1-31 August 2018 | 1-30 June 2019 | 1-15 July 2019 | Minimum         | Average ± SD | Maximum |
| Imandra           |            |                      |                                 |                  |                |                |                 |              |         |
| 1_1               | S          | 410                  | 23.4±5.1                        | 13.0±4.8         | 10.3±5.7       | 8.1±3.5        | 8               | 24±17        | 41      |
| 1_2               | S          | 400                  | -                               | -                | -              | -              | 29              | 49±20        | 69      |
| 1_3               | S          | 391                  | 22.4±5.6                        | 12.7±4.7         | 10.0±5.8       | 8.1±3.6        | 42              | 62±20        | 83      |
| 2_1               | N          | 414                  | 22.8±5.5                        | 12.8±4.9         | 10.1±5.8       | 8.0±3.6        | 17              | 27±9         | 36      |
| 2_2               | N          | 393                  | -                               | -                | -              | -              | 104             | 138±34       | 172     |
| 2_3               | N          | 370                  | 21.8±5.0                        | 12.3±4.5         | 9.6±5.5        | 7.5±3.3        | 90              | 117±27       | 144     |
| Small Vudayvr     |            |                      |                                 |                  |                |                |                 |              |         |
| 1_1               | NE         | 602                  | -                               | -                | -              | -              | 150             | 206±30       | 263     |
| 1_2               | NE         | 525                  | -                               | -                | -              | -              | 156             | 238±43       | 330     |
| 1_3               | NE         | 496                  | 19.3±3.3                        | 11.7±3.9         | 9.4±3.8        | 9.0±2.4        | 169             | 209±15       | 254     |
| 1_4               | NE         | 480                  | -                               | -                | -              | -              | 118             | 177±26       | 249     |
| 2_1               | E          | 600                  | 19.7±3.2                        | 11.7±4.0         | 9.7±4.0        | 9.1±2.7        | 175             | 225±23       | 280     |
| 2_2               | E          | 572                  | -                               | -                | -              | -              | 128             | 219±32       | 275     |
| 2_3               | E          | 530                  | -                               | -                | -              | -              | 165             | 206±20       | 270     |
| 4_1               | SE         | 662                  | 20.4±3.2                        | 11.1±3.8         | 9.1±4.3        | 8.1±3.1        | 51              | 149±47       | 251     |
| 4_2               | SE         | 602                  | -                               | -                | -              | -              | 96              | 187±33       | 290     |
| 4_3               | SE         | 560                  | 20.6±2.8                        | 11.9±3.8         | 9.6±4.2        | 9.0±2.9        | 115             | 196±35       | 320     |
| Kitchepakh        |            |                      |                                 |                  |                |                |                 |              |         |
| 1_1               | E          | 409                  | 21.9±5.2                        | 12.6±4.4         | 10.8±6.1       | -              | 5               | 73±29        | 138     |
| 1_2               | E          | 350                  | -                               | -                | -              | -              | 20              | 109±34       | 188     |
| 1_3               | E          | 323                  | 22.6±6.0                        | 13.2±4.5         | 11.2±5.8       | -              | 92              | 159±38       | 227     |
| 1_4               | E          | 288                  | -                               | -                | -              | -              | 108             | 148±15       | 210     |
| 2_1               | SE         | 433                  | -                               | -                | -              | -              | 26              | 158±58       | 257     |
| 2_2               | SE         | 370                  | -                               | -                | -              | -              | 70              | 183±34       | 280     |
| 2_3               | SE         | 334                  | -                               | -                | -              | -              | 36              | 140±36       | 290     |
| 2_4               | SE         | 305                  | -                               | -                | -              | -              | 117             | 144±12       | 179     |
| 3_1               | S          | 447                  | 21.3±5.3                        | 12.2±4.3         | 10.6±6.0       | -              | 2               | 79±41        | 166     |
| 3_2               | S          | 375                  | 22.1±6.0                        | 12.6±4.6         | 10.7±6.1       | -              | 11              | 144±45       | 232     |
| 3_3               | S          | 333                  | 22.5±5.9                        | 13.1±4.4         | 11.1±5.8       | -              | 80              | 138±35       | 188     |
| 3_4               | S          | 306                  | -                               | -                | -              | -              | 122             | 148±8        | 171     |

Table S2. Average air temperature, the height of the snow cover and the time of its melting at different altitude levels of the profiles on the slopes of the Sukhie Gory massif (Putorana Plateau region) in 2018-2019.

| Profile and level | Exposition | Altitude a. s. l., m | Average air temperature $\pm$ SD ( $^{\circ}$ C) |                     |                |                | Snow depth (cm) |                  |         |
|-------------------|------------|----------------------|--------------------------------------------------|---------------------|----------------|----------------|-----------------|------------------|---------|
|                   |            |                      | 15-31 August 2018                                | 1-31 September 2018 | 1-30 May 2019  | 1-15 June 2019 | Minimum         | Average $\pm$ SD | Maximum |
| 1_1               | S          | 604                  | 10.4 $\pm$ 5.1                                   | 2.5 $\pm$ 4.8       | -1.3 $\pm$ 5.7 | 7.0 $\pm$ 3.5  | 0               | 20 $\pm$ 1       | 85      |
| 1_2               | S          | 586                  | 10.6 $\pm$ 5.1                                   | 3.2 $\pm$ 4.8       | -2.4 $\pm$ 5.7 | 6.6 $\pm$ 3.5  | 50              | 166 $\pm$ 3      | 255     |
| 1_3               | S          | 563                  | 10.6 $\pm$ 5.1                                   | 3.4 $\pm$ 4.8       | -2.4 $\pm$ 5.7 | 6.6 $\pm$ 3.5  | 50              | 106 $\pm$ 2      | 190     |
| 1_4               | S          | 515                  | –                                                | –                   | –              | –              | 90              | 124 $\pm$ 2      | 170     |
| 2_1               | N          | 380                  | –                                                | –                   | –              | –              | –               | –                | –       |
| 2_2               | N          | 335                  | 12.3 $\pm$ 5.0                                   | 4.8 $\pm$ 4.5       | 0.3 $\pm$ 5.5  | 8.7 $\pm$ 3.3  | 55              | 88 $\pm$ 2       | 140     |
| 2_3               | N          | 258                  | 12.2 $\pm$ 5.0                                   | 4.8 $\pm$ 4.5       | 0.5 $\pm$ 5.5  | 9.0 $\pm$ 3.3  | 105             | 161 $\pm$ 2      | 215     |
| 2_4               | N          | 224                  | –                                                | –                   | –              | –              | 105             | 140 $\pm$ 3      | 230     |
| 3_1               | W          | 630                  | 10.4 $\pm$ 3.3                                   | 2.5 $\pm$ 3.9       | -1.3 $\pm$ 3.8 | 7.0 $\pm$ 2.4  | 5               | 70 $\pm$ 3       | 195     |
| 3_3               | W          | 579                  | 10.8 $\pm$ 3.3                                   | 3.2 $\pm$ 3.9       | -0.9 $\pm$ 3.8 | 7.3 $\pm$ 2.4  | 25              | 128 $\pm$ 4      | 207     |
| 3_5               | W          | 500                  | 10.9 $\pm$ 3.3                                   | 3.2 $\pm$ 3.9       | 0.0 $\pm$ 3.8  | 7.9 $\pm$ 2.4  | 76              | 131 $\pm$ 2      | 191     |
| 3_7               | W          | 458                  | –                                                | –                   | –              | –              | 80              | 130 $\pm$ 4      | 195     |
| 4_1               | E          | 620                  | 10.7 $\pm$ 3.2                                   | 3.2 $\pm$ 4.0       | -1.6 $\pm$ 4.0 | 7.0 $\pm$ 2.7  | 0               | 34 $\pm$ 2       | 145     |
| 4_3               | E          | 458                  | 11.2 $\pm$ 3.2                                   | 3.9 $\pm$ 4.0       | -0.7 $\pm$ 4.0 | 7.5 $\pm$ 2.7  | 0               | 75 $\pm$ 2       | 190     |
| 4_5               | E          | 413                  | 11.7 $\pm$ 3.2                                   | 4.3 $\pm$ 4.0       | -0.3 $\pm$ 4.0 | 7.8 $\pm$ 2.7  | 0               | 76 $\pm$ 4       | 246     |
| 4_7               | E          | 358                  | –                                                | –                   | –              | –              | 55              | 132 $\pm$ 3      | 205     |

Table S3. Average morphometric parameters of trees (mean value  $\pm$  standard deviation, SD) and areal characteristics of forest stands at different altitude levels of altitude profiles within the forest-tundra ecotone (1-3 levels) and the upper part of the mountain-forest belt (level 4) on the slopes of the mountains on the slopes of Mount Imandra (Khibiny massif). Species' abbreviations: BP, birch; PS, Scots pine; PO, Norway spruce.

| Profile and level | Exposition | Altitude a. s.<br>l, m | Species | Diameter at base<br>(cm) |      | Stem height<br>(m) |      | Age (years)     |     | Crown<br>diameter (m) |     | Crown projective<br>cover m <sup>2</sup> /ha | Sum of the cross-<br>sectional areas of<br>the stems, m <sup>2</sup> /ha | Density,<br>ind./ha |       |
|-------------------|------------|------------------------|---------|--------------------------|------|--------------------|------|-----------------|-----|-----------------------|-----|----------------------------------------------|--------------------------------------------------------------------------|---------------------|-------|
|                   |            |                        |         | Mean                     | Max. | Mean               | Max  | Mean            | Max | Mean                  | Max |                                              |                                                                          | <1.3m               | >1.3m |
| 1_1               | S          | 410                    | BP      | 3.2 $\pm$<br>1.6         | 7.0  | 1.2 $\pm$<br>0.6   | 2.6  | 53 $\pm$<br>21  | 89  | 1.2 $\pm$<br>0.7      | 2.6 | 158                                          | 0.2                                                                      | 65                  | 23    |
| 1_1               | S          | 410                    | PS      | 2.1 $\pm$<br>1.9         | 11.8 | 0.7 $\pm$<br>0.5   | 4.2  | 19 $\pm$<br>13  | 58  | 0.5 $\pm$<br>0.4      | 1.8 | 90                                           | 0.2                                                                      | 241                 | 45    |
| 1_2               | S          | 400                    | BP      | 5.1 $\pm$<br>3.0         | 15.0 | 2.0 $\pm$<br>1.4   | 5.0  | 48 $\pm$<br>21  | 99  | 1.7 $\pm$<br>1.5      | 5.2 | 1517                                         | 1.9                                                                      | 133                 | 1017  |
| 1_2               | S          | 400                    | PS      | 9.2 $\pm$<br>6.3         | 32.5 | 3.5 $\pm$<br>2.1   | 9.8  | 43 $\pm$<br>27  | 184 | 1.4 $\pm$<br>0.9      | 5.2 | 2264                                         | 11.1                                                                     | 1517                | 1017  |
| 1_3               | S          | 391                    | BP      | 4.2 $\pm$<br>2.3         | 9.2  | 1.8 $\pm$<br>0.9   | 3.1  | 53 $\pm$<br>27  | 103 | 1.4 $\pm$<br>0.8      | 3.2 | 627                                          | 0.5                                                                      | 83                  | 217   |
| 1_3               | S          | 391                    | PS      | 10.3 $\pm$<br>6.3        | 28.7 | 5.2 $\pm$<br>2.9   | 13.2 | 49 $\pm$<br>18  | 82  | 1.5 $\pm$<br>0.8      | 4.1 | 5188                                         | 26.1                                                                     | 1983                | 2233  |
| 1_4               | S          | 354                    | PS      | 9.4 $\pm$<br>9.9         | 51.0 | 5.8 $\pm$<br>4.0   | 16.0 | 50 $\pm$<br>32  | 258 | 1.6 $\pm$<br>1.3      | 7.2 | 10319                                        | 49.8                                                                     | 867                 | 3450  |
| 2_1               | S          | 414                    | BP      | 3.6 $\pm$<br>1.6         | 9.2  | 1.8 $\pm$<br>0.6   | 3.2  | 77 $\pm$<br>28  | 135 | 1.8 $\pm$<br>0.8      | 3.9 | 206                                          | 0.3                                                                      | 31                  | 119   |
| 2_1               | S          | 414                    | PS      | 5.4 $\pm$<br>3.0         | 13.1 | 1.8 $\pm$<br>0.9   | 4.0  | 44 $\pm$<br>14  | 58  | 1.0 $\pm$<br>0.4      | 1.6 | 38                                           | 0.1                                                                      | 43                  | 20    |
| 2_2               | S          | 393                    | BP      | 3.7 $\pm$<br>2.2         | 13.4 | 1.5 $\pm$<br>0.7   | 4.1  | 92 $\pm$<br>35  | 180 | 1.5 $\pm$<br>0.8      | 3.8 | 4283                                         | 6.7                                                                      | 650                 | 1033  |
| 2_3               | S          | 370                    | BP      | 4.0 $\pm$<br>2.8         | 26.4 | 1.9 $\pm$<br>1.2   | 7.6  | 91 $\pm$<br>45  | 231 | 1.7 $\pm$<br>0.9      | 4.8 | 6279                                         | 12.1                                                                     | 667                 | 1567  |
| 2_4               | S          | 345                    | BP      | 8.1 $\pm$<br>5.3         | 24.2 | 5.8 $\pm$<br>2.6   | 14.0 | 80 $\pm$<br>25  | 146 | 3.3 $\pm$ 1.8         | 9.6 | 9033                                         | 15.6                                                                     | 83                  | 833   |
| 2_4               | S          | 345                    | PO      | 18.8 $\pm$<br>13.5       | 45.5 | 9.0 $\pm$<br>4.3   | 18.9 | 119 $\pm$<br>62 | 302 | 3.2 $\pm$ 1.2         | 6.1 | 2636                                         | 17.7                                                                     | 0                   | 383   |

Table S4. Average morphometric parameters of birch trees (mean value  $\pm$  SD) and areal characteristics of forest stands at different altitude levels of altitude profiles within the forest-tundra ecotone (1-3 levels) and the upper part of the mountain-forest belt (level 4) on the slopes of the mountains in the valley of the lake. Small Vudayvr (Khibiny massif).

| Profile and level | Exposition | Altitude a. s.<br>L, m | Diameter at base<br>(cm) |      | Stem height (m) |      | Age (years)    |     | Crown diameter<br>(m) |     | Crown projective<br>cover m <sup>2</sup> /ha | Sum of the cross-<br>sectional areas of<br>the stems, m <sup>2</sup> /ha | Density,<br>ind./ha |       |
|-------------------|------------|------------------------|--------------------------|------|-----------------|------|----------------|-----|-----------------------|-----|----------------------------------------------|--------------------------------------------------------------------------|---------------------|-------|
|                   |            |                        | Mean                     | Max. | Mean            | Max  | Mean           | Max | Mean                  | Max |                                              |                                                                          | <1.3m               | >1.3m |
| 1_1               | N<br>E     | 602                    | 6.2 $\pm$<br>4.5         | 26.8 | 2.4 $\pm$ 1.1   | 5.1  | 50 $\pm$<br>22 | 101 | 1.7 $\pm$ 1.0         | 4.4 | 2860                                         | 8.4                                                                      | 183                 | 733   |
| 1_2               | N<br>E     | 523                    | 5.9 $\pm$<br>5.1         | 27.4 | 2.8 $\pm$ 1.6   | 7.8  | 50 $\pm$<br>21 | 95  | 1.9 $\pm$ 1.2         | 6.0 | 4128                                         | 11.0                                                                     | 183                 | 850   |
| 1_3               | N<br>E     | 497                    | 7.5 $\pm$<br>5.4         | 22.1 | 3.3 $\pm$ 2.0   | 8.8  | 58 $\pm$<br>23 | 105 | 2.1 $\pm$ 1.4         | 7.4 | 6639                                         | 16.5                                                                     | 250                 | 1183  |
| 1_4               | N<br>E     | 479                    | 9.2 $\pm$<br>5.8 $\pm$   | 27.4 | 6.0 $\pm$ 3.0   | 13.5 | 73 $\pm$<br>18 | 104 | 2.8 $\pm$ 1.4         | 6.1 | 9081                                         | 18.8                                                                     | 0                   | 1183  |
| 2_1               | E          | 552                    | 5.7 $\pm$<br>3.8         | 16.2 | 2.2 $\pm$ 1.3   | 5.0  | 46 $\pm$<br>22 | 96  | 1.6 $\pm$ 1.2         | 4.1 | 1878                                         | 4.5                                                                      | 150                 | 467   |
| 2_2               | E          | 501                    | 6.7 $\pm$<br>5.9         | 27.5 | 2.5 $\pm$ 2.2   | 7.0  | 36 $\pm$<br>21 | 84  | 1.6 $\pm$ 1.5         | 5.5 | 2548                                         | 9.1                                                                      | 317                 | 367   |
| 2_3               | E          | 481                    | 8.6 $\pm$<br>6.0         | 29.0 | 3.7 $\pm$ 2.2   | 9.6  | 52 $\pm$<br>19 | 97  | 2.2 $\pm$ 1.4         | 6.0 | 3824                                         | 10.9                                                                     | 67                  | 617   |
| 2_4               | E          | 446                    | 7.3 $\pm$<br>5.5         | 27.4 | 4.8 $\pm$ 2.8   | 10.4 | 75 $\pm$<br>30 | 166 | 2.6 $\pm$ 1.4         | 7.0 | 10949                                        | 27.2                                                                     | 117                 | 1383  |
| 3_1               | SE         | 630                    | 3.9 $\pm$<br>3.3         | 21.0 | 1.4 $\pm$ 1.1   | 4.6  | 32 $\pm$<br>18 | 101 | 1.0 $\pm$ 0.9         | 4.1 | 1338                                         | 3.5                                                                      | 533                 | 350   |
| 3_2               | SE         | 566                    | 4.3 $\pm$<br>3.8         | 17.5 | 1.6 $\pm$ 1.1   | 5.3  | 31 $\pm$<br>14 | 77  | 1.0 $\pm$ 1.0         | 4.7 | 3382                                         | 12.1                                                                     | 950                 | 1067  |
| 3_3               | SE         | 542                    | 5.8 $\pm$<br>4.4         | 21.3 | 2.7 $\pm$ 1.6   | 7.4  | 52 $\pm$<br>27 | 143 | 2.2 $\pm$ 1.4         | 6.0 | 6859                                         | 27.1                                                                     | 233                 | 1067  |
| 3_4               | SE         | 490                    | 8.9 $\pm$<br>5.7         | 33.4 | 7.4 $\pm$ 3.0   | 12.5 | 81 $\pm$<br>25 | 196 | 2.9 $\pm$ 1.5         | 7.8 | 11862                                        | 28.4                                                                     | 50                  | 1433  |
| 4_1               | S<br>W     | 663                    | 2.3 $\pm$<br>2.1         | 13.7 | 0.8 $\pm$ 0.6   | 2.6  | 31 $\pm$<br>19 | 113 | 0.7 $\pm$ 0.7         | 3.9 | 1824                                         | 2.8                                                                      | 1933                | 500   |
| 4_2               | S<br>W     | 602                    | 5.1 $\pm$<br>3.4         | 17.5 | 1.9 $\pm$ 1.1   | 4.4  | 56 $\pm$<br>29 | 122 | 1.5 $\pm$ 1.1         | 6.2 | 5611                                         | 16.0                                                                     | 667                 | 1267  |
| 4_3               | S<br>W     | 569                    | 4.6 $\pm$<br>3.7         | 16.9 | 1.9 $\pm$ 1.2   | 4.3  | 50 $\pm$<br>32 | 117 | 1.5 $\pm$ 1.3         | 4.3 | 10244                                        | 21.5                                                                     | 1083                | 1467  |
| 4_4               | S<br>W     | 514                    | 6.3 $\pm$<br>4.5         | 24.2 | 4.3 $\pm$ 1.8   | 9.0  | 82 $\pm$<br>28 | 140 | 3.0 $\pm$ 1.4         | 6.6 | 13301                                        | 32.8                                                                     | 83                  | 1450  |

Table S5. Average morphometric parameters of trees (mean value  $\pm$  SD) and areal characteristics of forest stands at various altitude levels of altitude profiles within the forest-tundra ecotone (1-3 levels) and the upper part of the mountain-forest belt (4-5 levels) on the slopes of Mount Kitchepakh (Khibiny massif). Species' abbreviations: BP, birch; PO, Norway spruce.

| Profile and level | Exposition | Altitude a. s.<br>l., m | Species | Diameter at base<br>(cm) |      | Stem height (m) |      | Age (years)     |     | Crown<br>diameter (m) |     | Crown projective<br>cover m <sup>2</sup> /ha | Sum of the cross-<br>sectional areas of<br>the stems, m <sup>2</sup> /ha | Density,<br>ind./ha |       |
|-------------------|------------|-------------------------|---------|--------------------------|------|-----------------|------|-----------------|-----|-----------------------|-----|----------------------------------------------|--------------------------------------------------------------------------|---------------------|-------|
|                   |            |                         |         | Mean                     | Max. | Mean            | Max  | Mean            | Max | Mean                  | Max |                                              |                                                                          | <1.3m               | >1.3m |
| 1_1               | E          | 409                     | BP      | 3.9 $\pm$<br>2.4         | 11.8 | 1.2 $\pm$ 0.9   | 4.4  | 43 $\pm$<br>19  | 94  | 1.0 $\pm$ 0.8         | 3.4 | 552                                          | 1.2                                                                      | 213                 | 263   |
| 1_2               | E          | 350                     | BP      | 5.9 $\pm$<br>3.2         | 17.8 | 2.2 $\pm$ 1.0   | 4.8  | 61 $\pm$<br>25  | 133 | 1.9 $\pm$ 1.1         | 5.8 | 6523                                         | 14.2                                                                     | 225                 | 1488  |
| 1_2               | E          | 350                     | PO      | 9.2 $\pm$<br>7.2         | 23.1 | 2.4 $\pm$ 2.0   | 7.0  | 49 $\pm$<br>34  | 117 | 1.5 $\pm$ 0.9         | 3.4 | 88                                           | 0.4                                                                      | 38                  | 38    |
| 1_3               | E          | 323                     | BP      | 5.5 $\pm$<br>4.3         | 23.6 | 1.8 $\pm$ 1.0   | 5.5  | 47 $\pm$<br>22  | 129 | 1.2 $\pm$ 1.0         | 6.6 | 5688                                         | 15.8                                                                     | 650                 | 2400  |
| 1_3               | E          | 323                     | PO      | 5.7 $\pm$<br>5.3         | 38.0 | 1.7 $\pm$ 1.6   | 6.8  | 38 $\pm$<br>20  | 95  | 0.9 $\pm$ 0.9         | 4.7 | 513                                          | 2.3                                                                      | 238                 | 125   |
| 1_4               | E          | 288                     | BP      | 4.5 $\pm$<br>3.0         | 15.8 | 2.7 $\pm$ 1.6   | 7.0  | 60 $\pm$<br>28  | 133 | 1.3 $\pm$ 0.9         | 4.3 | 3991                                         | 11.4                                                                     | 625                 | 1675  |
| 1_4               | E          | 288                     | PO      | 14.8 $\pm$<br>10.3       | 47.8 | 5.5 $\pm$ 2.4   | 10.0 | 89 $\pm$<br>55  | 286 | 2.8 $\pm$ 1.4         | 6.1 | 3801                                         | 22.5                                                                     | 650                 | 825   |
| 1_5               | E          | 265                     | BP      | 5.8 $\pm$<br>4.4 $\pm$   | 27.2 | 4.6 $\pm$ 2.4   | 9.3  | 77 $\pm$<br>25  | 148 | 2.4 $\pm$ 1.2         | 5.4 | 5968                                         | 12.0                                                                     | 25                  | 1175  |
| 1_5               | E          | 265                     | PO      | 14.0 $\pm$<br>12.7 $\pm$ | 46.2 | 6.3 $\pm$ 5.4   | 21   | 105 $\pm$<br>61 | 249 | 2.1 $\pm$ 1.4         | 4.9 | 4334                                         | 29.7                                                                     | 250                 | 675   |
| 2_1               | SE         | 433                     | BP      | 3.9 $\pm$<br>3.0         | 11.5 | 1.2 $\pm$ 0.8   | 2.6  | 44 $\pm$<br>22  | 94  | 1.0 $\pm$ 0.7         | 2.5 | 472                                          | 0.8                                                                      | 138                 | 250   |
| 2_1               | SE         | 433                     | PO      | 4.5 $\pm$<br>3.1         | 13.3 | 0.9 $\pm$ 0.5   | 2.0  | 52 $\pm$<br>32  | 126 | 1.2 $\pm$ 1.0         | 3.4 | 175                                          | 0.3                                                                      | 50                  | 50    |
| 2_2               | SE         | 370                     | BP      | 8.5 $\pm$<br>3.6         | 20.9 | 2.2 $\pm$ 1.0   | 4.7  | 80 $\pm$<br>29  | 195 | 2.5 $\pm$ 1.3         | 6.0 | 4799                                         | 10.4                                                                     | 50                  | 750   |
| 2_3               | SE         | 334                     | BP      | 7.8 $\pm$<br>4.3         | 30.3 | 2.5 $\pm$ 1.1   | 6.6  | 74 $\pm$<br>26  | 121 | 2.2 $\pm$ 1.0         | 4.4 | 4761                                         | 11.8                                                                     | 25                  | 613   |
| 2_3               | SE         | 334                     | PO      | 11.5 $\pm$<br>8.1        | 38.2 | 3.1 $\pm$ 1.9   | 7.6  | 93 $\pm$<br>39  | 201 | 1.8 $\pm$ 1.0         | 4.2 | 1728                                         | 13.7                                                                     | 150                 | 338   |
| 2_4               | SE         | 305                     | BP      | 7.5 $\pm$<br>1.7         | 10.8 | 3.8 $\pm$ 0.6   | 4.2  | 119 $\pm$<br>55 | 168 | 4.5 $\pm$ 1.0         | 5.6 | 1297                                         | 1.5                                                                      | 175                 | 75    |
| 2_4               | SE         | 305                     | PO      | 6.0 $\pm$<br>4.2         | 27.4 | 3.2 $\pm$ 1.5   | 7.3  | 71 $\pm$<br>32  | 194 | 2.0 $\pm$ 1.1         | 6.5 | 5582                                         | 15.2                                                                     | 1125                | 1275  |
| 2_5               | SE         | 280                     | BP      | 5.6 $\pm$<br>4.1         | 19.4 | 3.9 $\pm$ 2.1   | 9.0  | 73 $\pm$<br>22  | 111 | 2.0 $\pm$ 1.0         | 4.7 | 2723                                         | 6.4                                                                      | 25                  | 750   |
| 2_5               | SE         | 280                     | PO      | 11.6 $\pm$<br>9.9        | 47.8 | 5.5 $\pm$ 3.8   | 16.0 | 92 $\pm$<br>56  | 310 | 1.9 $\pm$ 1.0         | 5.4 | 5389                                         | 30.3                                                                     | 950                 | 1425  |
| 3_1               | S          | 447                     | BP      | 5.0 $\pm$<br>3.3         | 18.8 | 1.1 $\pm$ 0.5   | 2.3  | 53 $\pm$<br>23  | 109 | 1.9 $\pm$ 1.4         | 4.2 | 2137                                         | 2.2                                                                      | 63                  | 388   |
| 3_2               | S          | 375                     | BP      | 6.6 $\pm$<br>3.0         | 17.2 | 2.2 $\pm$ 0.9   | 3.8  | 73 $\pm$<br>24  | 136 | 2.4 $\pm$ 1.5         | 7.2 | 6759                                         | 12.6                                                                     | 100                 | 1000  |
| 3_3               | S          | 333                     | BP      | 7.7 $\pm$<br>4.6         | 33.4 | 2.8 $\pm$ 1.2   | 5.7  | 79 $\pm$<br>27  | 161 | 2.6 $\pm$ 1.3         | 6.0 | 6176                                         | 23.9                                                                     | 25                  | 375   |
| 3_3               | S          | 333                     | PO      | 12.2 $\pm$<br>8.7        | 31.2 | 3.2 $\pm$ 2.4   | 7.0  | 88 $\pm$<br>37  | 158 | 1.8 $\pm$ 1.2         | 4.3 | 702                                          | 6.7                                                                      | 38                  | 88    |
| 3_4               | S          | 306                     | BP      | 7.0 $\pm$<br>4.6         | 24.5 | 4.6 $\pm$ 1.7   | 8.2  | 81 $\pm$<br>30  | 139 | 2.7 $\pm$ 1.2         | 5.8 | 6098                                         | 15.5                                                                     | 25                  | 900   |
| 3_4               | S          | 306                     | PO      | 12.4 $\pm$<br>9.4        | 40.8 | 6.0 $\pm$ 3.1   | 11.3 | 129 $\pm$<br>67 | 282 | 2.1 $\pm$ 1.0         | 4.4 | 4570                                         | 33.7                                                                     | 150                 | 1050  |

Table S6. Average morphometric parameters of larch trees (mean value  $\pm$  SD) and areal characteristics of forest stands at different altitude levels of altitude profiles within the forest-tundra ecotone (levels 1-3) and the upper part of the mountain-forest belt (level 4) on the slopes of the Sukhie Gory massif (Putorana Plateau).

| Profile and level | Exposition | Altitude a. s. l., m | Diameter at base (cm) |      | Stem height (m) |      | Age (years)  |     | Crown diameter (m) |      | Crown projective cover<br>m <sup>2</sup> /ha | Sum of the cross-sectional areas of the stems, m <sup>2</sup> /ha |
|-------------------|------------|----------------------|-----------------------|------|-----------------|------|--------------|-----|--------------------|------|----------------------------------------------|-------------------------------------------------------------------|
|                   |            |                      | Mean                  | Max. | Mean            | Max  | Mean         | Max | Mean               | Max  |                                              |                                                                   |
| 1_1               | S          | 604                  | 5.8 $\pm$ 3.0         | 12.7 | 2.0 $\pm$ 1.0   | 3.8  | 41 $\pm$ 19  | 120 | 1.4 $\pm$ 0.7      | 2.9  | 591                                          | 1.0                                                               |
| 1_3               | S          | 586                  | 7.6 $\pm$ 5.2         | 25.5 | 3.7 $\pm$ 2.0   | 10.0 | 51 $\pm$ 26  | 139 | 2.1 $\pm$ 1.2      | 5.1  | 3528                                         | 8.1                                                               |
| 1_5               | S          | 563                  | 13.1 $\pm$ 11.6       | 50.0 | 5.4 $\pm$ 3.8   | 12.5 | 92 $\pm$ 63  | 354 | 2.5 $\pm$ 2.0      | 8.0  | 6082                                         | 18.8                                                              |
| 1_7               | S          | 515                  | 17.6 $\pm$ 11.6       | 49.0 | 7.3 $\pm$ 4.4   | 19.5 | -            | -   | 2.5 $\pm$ 1.5      | 7.2  | 8097                                         | 44.7                                                              |
| 2_1               | E          | 620                  | 9.0 $\pm$ 4.5         | 27.0 | 3.8 $\pm$ 2.0   | 9.0  | 52 $\pm$ 29  | 176 | 1.9 $\pm$ 0.9      | 3.8  | 439                                          | 1.0                                                               |
| 2_3               | E          | 458                  | 10.8 $\pm$ 7.9        | 38.0 | 5.7 $\pm$ 3.4   | 14.0 | 88 $\pm$ 52  | 227 | 2.2 $\pm$ 1.1      | 4.8  | 2548                                         | 7.9                                                               |
| 2_5               | E          | 413                  | 8.5 $\pm$ 8.2         | 43.0 | 4.7 $\pm$ 3.7   | 14.0 | 71 $\pm$ 54  | 391 | 1.8 $\pm$ 1.3      | 5.5  | 4444                                         | 13.8                                                              |
| 2_7               | E          | 358                  | 17.6 $\pm$ 13.1       | 62.0 | 7.5 $\pm$ 5.0   | 21.0 | -            | -   | 2.4 $\pm$ 1.7      | 8.0  | 6326                                         | 34.9                                                              |
| 4_1               | W          | 630                  | 7.6 $\pm$ 5.6         | 31.0 | 3.4 $\pm$ 2.3   | 11.0 | 56 $\pm$ 42  | 340 | 1.4 $\pm$ 0.8      | 3.8  | 1452                                         | 5.0                                                               |
| 4_3               | W          | 579                  | 10.2 $\pm$ 8.1        | 30.0 | 5.4 $\pm$ 4.4   | 17.5 | 91 $\pm$ 77  | 312 | 2.1 $\pm$ 1.9      | 7.8  | 3962                                         | 8.0                                                               |
| 4_5               | W          | 500                  | 17.0 $\pm$ 8.7        | 40.0 | 7.4 $\pm$ 3.8   | 17.0 | 151 $\pm$ 51 | 268 | 3.1 $\pm$ 1.6      | 8.0  | 13096                                        | 37.2                                                              |
| 4_7               | W          | 458                  | 19.5 $\pm$ 9.8        | 46.0 | 8.3 $\pm$ 3.3   | 15.5 | -            | -   | 2.2 $\pm$ 1.0      | 5.0  | 7065                                         | 55.3                                                              |
| 5_1               | N          | 380                  | 11.3 $\pm$ 9.3        | 37.0 | 3.5 $\pm$ 2.0   | 8.5  | 85 $\pm$ 40  | 171 | 2.7 $\pm$ 1.9      | 7.8  | 2342                                         | 4.5                                                               |
| 5_3               | N          | 258                  | 15.2 $\pm$ 11.3       | 48.0 | 6.1 $\pm$ 3.9   | 15.2 | 83 $\pm$ 52  | 286 | 3.5 $\pm$ 2.3      | 10.4 | 10587                                        | 22.1                                                              |
| 5_5               | N          | 224                  | 27.5 $\pm$ 12.4       | 52.0 | 10.5 $\pm$ 4.7  | 20.8 | -            | -   | 3.8 $\pm$ 1.5      | 7.8  | 6181                                         | 37.9                                                              |
| 5_7               | N          | 204                  | 20.9 $\pm$ 11.7       | 54.0 | 15.6 $\pm$ 6.6  | 25.0 | -            | -   | 2.0 $\pm$ 0.9      | 3.9  | 4666                                         | 55.8                                                              |

Table S7. Spearman correlation coefficients calculated between the number of trees recruited in the Khibiny massif treeline ecotones over five years and climatic parameters corresponding to previous (first value in each cell) and current (second value in each cell) five-year periods (values with a significance level of  $p < 0.05$  are highlighted in red).

| Exposition                                        | Altitudinal level |               |               |               |               |
|---------------------------------------------------|-------------------|---------------|---------------|---------------|---------------|
|                                                   | 1                 | 3             | 5             | 7             | All           |
| Mount Imandra (Scots pine)                        |                   |               |               |               |               |
| Precipitation in July                             |                   |               |               |               |               |
| N                                                 | 0.55 / 0.50       | -0.38 / -0.46 | - / -         | - / -         | 0.20 / 0.07   |
| S                                                 | 0.57 / 0.67       | 0.39 / 0.64   | 0.54 / 0.47   | 0.14 / -0.13  | 0.45 / 0.51   |
| All                                               | 0.63 / 0.71       | 0.35 / 0.60   | 0.54 / 0.47   | 0.14 / -0.13  | 0.45 / 0.51   |
| Precipitation between November and December - / - |                   |               |               |               |               |
| N                                                 | 0.55 / 0.07       | -0.38 / -0.46 | - / -         | - / -         | 0.20 / -0.35  |
| S                                                 | 0.70 / 0.63       | 0.58 / 0.58   | -0.11 / -0.04 | 0.30 / 0.04   | 0.35 / 0.26   |
| All                                               | 0.71 / 0.49       | 0.56 / 0.56   | -0.11 / -0.04 | 0.30 / 0.04   | 0.35 / 0.26   |
| Snow depth at the end of December                 |                   |               |               |               |               |
| N                                                 | 0.51 / 0.40       | -0.59 / -0.31 | - / -         | - / -         | -0.19 / 0.11  |
| S                                                 | 0.72 / 0.86       | 0.70 / 0.81   | 0.10 / 0.16   | 0.44 / 0.17   | 0.53 / 0.56   |
| All                                               | 0.70 / 0.77       | 0.67 / 0.80   | 0.10 / 0.16   | 0.44 / 0.17   | 0.53 / 0.56   |
| Small Vudayvr (birch)                             |                   |               |               |               |               |
| Precipitation in July                             |                   |               |               |               |               |
| NE                                                | 0.17 / 0.10       | 0.04 / -0.53  | 0.06 / -0.15  | -0.50 / -0.40 | 0.12 / -0.25  |
| E                                                 | 0.11 / 0.18       | 0.37 / 0.67   | -0.31 / -0.52 | -0.63 / -0.25 | -0.51 / -0.20 |
| SE                                                | 0.58 / 0.28       | 0.39 / 0.15   | -0.02 / -0.17 | -0.25 / -0.54 | 0.49 / 0.05   |
| SW                                                | 0.63 / 0.48       | 0.34 / 0.07   | 0.33 / 0.14   | -0.43 / -0.47 | 0.58 / 0.31   |
| All                                               | 0.62 / 0.49       | 0.41 / 0.04   | 0.13 / -0.08  | -0.59 / -0.57 | 0.44 / 0.10   |
| Precipitation between November and December       |                   |               |               |               |               |
| NE                                                | 0.21 / 0.38       | 0.32 / -0.08  | -0.13 / -0.14 | -0.62 / -0.81 | 0.03 / -0.23  |
| E                                                 | 0.33 / 0.42       | 0.55 / 0.45   | -0.04 / -0.17 | -0.35 / -0.31 | -0.07 / 0.06  |
| SE                                                | 0.44 / 0.59       | 0.74 / 0.61   | 0.16 / 0.40   | -0.55 / -0.76 | 0.56 / 0.57   |
| SW                                                | 0.76 / 0.67       | 0.61 / 0.32   | 0.65 / 0.45   | -0.10 / -0.43 | 0.81 / 0.57   |
| All                                               | 0.66 / 0.71       | 0.76 / 0.45   | 0.35 / 0.37   | -0.55 / -0.80 | 0.64 / 0.48   |
| Snow depth at the end of December                 |                   |               |               |               |               |
| NE                                                | 0.38 / 0.37       | 0.27 / 0.11   | -0.13 / -0.12 | -0.81 / -0.81 | -0.03 / -0.11 |
| E                                                 | 0.35 / 0.42       | 0.51 / 0.64   | 0.19 / -0.18  | -0.44 / -0.35 | 0.14 / -0.08  |
| SE                                                | 0.66 / 0.55       | 0.88 / 0.61   | 0.44 / 0.37   | -0.69 / -0.78 | 0.68 / 0.54   |
| SW                                                | 0.86 / 0.80       | 0.59 / 0.40   | 0.66 / 0.55   | -0.34 / -0.59 | 0.82 / 0.71   |
| All                                               | 0.83 / 0.77       | 0.79 / 0.56   | 0.50 / 0.42   | -0.72 / -0.84 | 0.72 / 0.56   |
| Mount Kipchepakhk (birch)                         |                   |               |               |               |               |
| Precipitation in July                             |                   |               |               |               |               |
| E                                                 | -0.08 / -0.04     | -0.48 / -0.56 | 0.07 / 0.00   | -0.72 / -0.04 | -0.28 / -0.18 |
| SE                                                | 0.63 / 0.39       | -0.64 / -0.74 | -0.62 / -0.71 | -0.53 / -0.33 | -0.63 / -0.66 |
| S                                                 | -0.34 / -0.58     | -0.57 / -0.62 | -0.63 / -0.53 | -0.21 / -0.52 | -0.55 / -0.62 |
| All                                               | 0.03 / -0.15      | -0.64 / -0.69 | -0.32 / -0.13 | -0.65 / -0.53 | -0.50 / -0.46 |
| Precipitation between November and December       |                   |               |               |               |               |
| E                                                 | 0.28 / -0.07      | 0.02 / -0.33  | 0.55 / 0.23   | 0.01 / -0.01  | 0.20 / 0.04   |
| SE                                                | 0.00 / -0.05      | -0.30 / -0.48 | -0.18 / -0.48 | 0.02 / -0.41  | 0.24 / -0.58  |
| S                                                 | -0.12 / -0.34     | -0.52 / -0.55 | -0.44 / -0.67 | -0.42 / -0.57 | -0.52 / -0.72 |
| All                                               | 0.20 / -0.24      | -0.19 / -0.49 | 0.14 / -0.17  | -0.42 / -0.65 | 0.00 / 0.32   |
| Snow depth at the end of December                 |                   |               |               |               |               |
| E                                                 | 0.32 / 0.10       | -0.04 / -0.34 | 0.56 / 0.36   | -0.35 / -0.28 | 0.24 / 0.11   |
| SE                                                | 0.19 / 0.12       | -0.49 / -0.53 | -0.43 / -0.51 | -0.34 / -0.40 | -0.49 / -0.57 |
| S                                                 | -0.28 / -0.36     | -0.67 / -0.61 | -0.67 / -0.76 | -0.44 / -0.72 | -0.67 / -0.77 |
| All                                               | 0.17 / -0.04      | -0.32 / -0.49 | 0.00 / -0.06  | -0.57 / -0.77 | -0.15 / -0.33 |

Table S8. Spearman correlation coefficients calculated between the number of recruited larch trees on the Putorana Plateau treeline ecotones considering five-year age classes and climatic parameters corresponding to previous (first value in each cell) and current (second value in each cell) five-year periods (values with a significance level of  $p < 0.05$  are highlighted in red)

| Exposition                             | Altitudinal level    |                    |                    |                    |                    |
|----------------------------------------|----------------------|--------------------|--------------------|--------------------|--------------------|
|                                        | 1                    | 3                  | 5                  | 7                  | All                |
| Air temperature in July                |                      |                    |                    |                    |                    |
| N                                      | -0.15 / 0.21         | -0.24 / -0.32      | -0.06 / -0.22      | -0.06 / -0.22      | -0.21 / -0.06      |
| E                                      | 0.26 / <b>0.63</b>   | 0.25 / 0.38        | 0.28 / 0.44        | 0.28 / -0.02       | 0.32 / 0.43        |
| S                                      | -0.42 / <b>-0.64</b> | 0.35 / 0.19        | -0.06 / 0.37       | -0.36 / -0.09      | 0.10 / 0.22        |
| W                                      | 0.24 / <b>0.72</b>   | <b>0.49 / 0.62</b> | 0.32 / -0.08       | -0.26 / -0.35      | 0.29 / <b>0.60</b> |
| All                                    | 0.21 / <b>0.59</b>   | 0.27 / 0.34        | 0.22 / 0.42        | -0.12 / -0.01      | 0.17 / 0.40        |
| Precipitation from October to December |                      |                    |                    |                    |                    |
| N                                      | 0.19 / <b>0.57</b>   | 0.06 / 0.10        | - / -              | 0.13 / <b>0.61</b> | -0.01 / 0.31       |
| E                                      | 0.46 / <b>0.60</b>   | 0.41 / -0.01       | <b>0.70 / 0.77</b> | -0.19 / -0.40      | <b>0.64 / 0.64</b> |
| S                                      | 0.06 / 0.24          | <b>0.56 / 0.66</b> | 0.45 / <b>0.69</b> | 0.11 / 0.35        | <b>0.53 / 0.67</b> |
| W                                      | 0.20 / 0.55          | 0.17 / 0.24        | 0.37 / 0.28        | - / -              | 0.25 / 0.47        |
| All                                    | 0.46 / <b>0.84</b>   | 0.42 / 0.20        | <b>0.70 / 0.86</b> | -0.07 / 0.24       | 0.49 / <b>0.78</b> |
| Snow depth at the end of December      |                      |                    |                    |                    |                    |
| N                                      | 0.34 / 0.49          | -0.31 / 0.12       | - / -              | 0.27 / 0.47        | -0.12 / 0.19       |
| E                                      | <b>0.81</b> / 0.29   | 0.44 / 0.23        | <b>0.61 / 0.58</b> | -0.50 / -0.26      | <b>0.54</b> / 0.50 |
| S                                      | 0.13 / <b>0.61</b>   | <b>0.53 / 0.70</b> | <b>0.85</b> / 0.44 | 0.30 / 0.53        | <b>0.72 / 0.80</b> |
| W                                      | <b>0.61</b> / 0.24   | 0.27 / 0.05        | 0.26 / 0.44        | - / -              | <b>0.59</b> / 0.27 |
| All                                    | <b>0.76 / 0.60</b>   | 0.39 / 0.42        | <b>0.72 / 0.66</b> | -0.03 / 0.09       | <b>0.68 / 0.71</b> |
